# Supplementary material
Source: publisher figshare collection journal article supplement (https://sage.figshare.com/ndownloader/files/14501753)
Supplement: Supplementary file 1 [file 14501753]

**Cell**

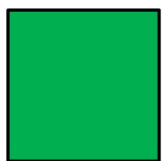

Cell  
type 1

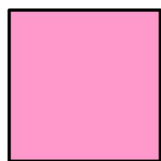

Cell  
type 2

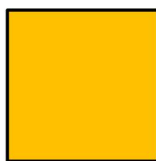

Cell  
type 3

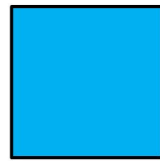

Cell  
type 4

... ..

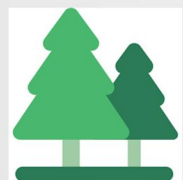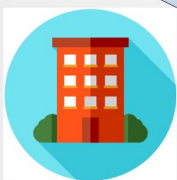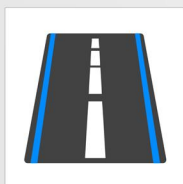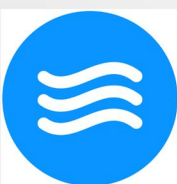

**Real world**

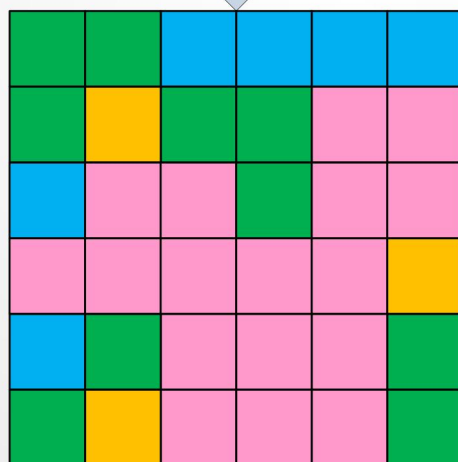

**Cell space**

**Transition rules**

Internal driving  
factors

External driving  
factors

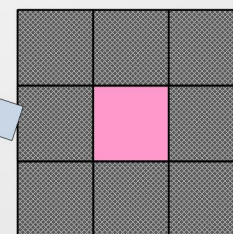

**Neighborhood Configuration**
